# Supplementary material
Source: ML conference proceedings conference paper supplement (https://openreview.net/forum?id=bdnw4qjfH9)
Supplement: supplementary_material [file attachment]

## A APPENDIX

### A.1 PROOFS

**Proof of Proposition 1** Denote the sampled  $u'_t = u_t + \varepsilon_t$ , where  $\varepsilon_t$  is the sampling error caused by variation in the sampling points. Consider the propagation of the error in the output values  $\{y_k\}_{k=1}^L$ :

$$\begin{bmatrix} y'_1 \\ y'_2 \\ \vdots \\ y'_L \end{bmatrix} = \begin{bmatrix} \overline{CB} & \mathbf{0} & \cdots & \mathbf{0} \\ \overline{CAB} & \overline{CB} & \cdots & \mathbf{0} \\ \vdots & \vdots & \ddots & \vdots \\ \overline{CA}^{T-1}\overline{B} & \overline{CA}^{T-2}\overline{B} & \cdots & \overline{CB} \end{bmatrix} \begin{bmatrix} u_1 + \varepsilon_1 \\ u_2 + \varepsilon_2 \\ \vdots \\ u_T + \varepsilon_t \end{bmatrix} \quad (29)$$

then

$$\begin{aligned} \|y'_t - y_t\| &= \|\overline{CA}^{t-1}\overline{B}\varepsilon_1 + \overline{CA}^{t-2}\overline{B}\varepsilon_2 + \cdots + \overline{CB}\varepsilon_t\| \\ &\leq \|\overline{A}^{t-1}\| \|\overline{B}\| |\varepsilon_1| + \|\overline{A}^{t-2}\| \|\overline{B}\| |\varepsilon_2| + \cdots + \|\overline{B}\| |\varepsilon_t| \\ &\leq |\lambda_{\max}|^{t-1} b\varepsilon_1 + |\lambda_{\max}|^{t-2} b\varepsilon_2 + \cdots + b\varepsilon_t \end{aligned} \quad (30)$$

Note that if  $\lambda_{\max} \geq 1$ ,  $\lim_{t \rightarrow \infty} \|y'_t - y_t\|$  becomes unbounded. If  $|\lambda_{\max}| < 1$ , then we have

$$\begin{aligned} \|\mathbf{x}_t\| &= \|\overline{A}^{L-1}\overline{B}u_1 + \overline{A}^{L-2}\overline{B}u_2 + \cdots + \overline{B}u_t\| \\ &\leq \|\overline{A}^{L-1}\| \|\overline{B}\| |u_1| + \|\overline{A}^{L-2}\| \|\overline{B}\| |u_2| + \cdots + \|\overline{B}\| |u_t| \\ &\leq |\lambda_{\max}|^{L-1} b\zeta + |\lambda_{\max}|^{L-2} b\zeta + \cdots + b\zeta, \end{aligned} \quad (31)$$

thus

$$\lim_{t \rightarrow \infty} \|\mathbf{x}_t\| \leq \lim_{t \rightarrow \infty} (|\lambda_{\max}|^{L-1} b\zeta + |\lambda_{\max}|^{L-2} b\zeta + \cdots + b\zeta) = \frac{b\zeta}{1 - |\lambda_{\max}|} < \lim_{t \rightarrow \infty} \|\mathbf{x}_t\| \quad (32)$$

contradicts the assumption, therefore there must be  $|\lambda_{\max}| \geq 1$ , which also implies that  $\lim_{t \rightarrow \infty} \|y'_t - y_t\|$  is unbounded.

**Remark** Note that imposing the constraint  $|\lambda_{\max}| < 1$  on the state space model will cause the initial input  $u_{t_0}$  to tend to zero as it propagates ( $\overline{A}^{t-t_0}\overline{B}u_{t_0} \xrightarrow[t-t_0 \rightarrow \infty]{} 0$ ). This causes all previous states to rapidly decay to 0 during the propagation, thus severely limits the long-term memory capacity of the model.

**Proof of Theorem 1** Taking into account the error propagation in latent states of the S4 model, the grid deviation error emerges from signal misalignment and can be considered as an additional disturbance term. Assuming that the actual sampled value, denoted as  $u'$ , satisfies the relationship  $u'_t = u_t + \varepsilon_t$ , where  $\varepsilon_t$  represents the error term, we can have

$$\begin{bmatrix} \mathbf{x}_1 \\ \mathbf{x}_2 \\ \vdots \\ \mathbf{x}_T \end{bmatrix} = \begin{bmatrix} \overline{B} & \mathbf{0} & \cdots & \mathbf{0} \\ \overline{AB} & \overline{B} & \cdots & \mathbf{0} \\ \vdots & \vdots & \ddots & \vdots \\ \overline{A}^{T-1}\overline{B} & \overline{A}^{T-2}\overline{B} & \cdots & \overline{B} \end{bmatrix} \begin{bmatrix} u_1 + \varepsilon_1 \\ u_2 + \varepsilon_2 \\ \vdots \\ u_T + \varepsilon_t \end{bmatrix} \quad (33)$$

observe that

$$\begin{aligned} \mathbf{x}_t &= \overline{A}^{t-1}\overline{B}(u_1 + \varepsilon_1) + \overline{A}^{t-2}\overline{B}(u_2 + \varepsilon_2) + \cdots + \overline{B}(u_t + \varepsilon_t) \\ &= \overline{A}^{t-1}\overline{B}u_1 + \overline{A}^{t-2}\overline{B}u_2 + \cdots + \overline{B}u_t + L(\varepsilon_1, \varepsilon_2, \dots, \varepsilon_t), \end{aligned} \quad (34)$$

where  $L(\varepsilon_1, \varepsilon_2, \dots, \varepsilon_t) = \overline{A}^{t-1}\overline{B}\varepsilon_1 + \overline{A}^{t-2}\overline{B}\varepsilon_2 + \cdots + \overline{B}\varepsilon_t$ . Consider its continuous form and drawing upon the controller concept in EMC theory, we consider the following state propagation:

$$\dot{\mathbf{x}}(t) = \mathbf{A} \left( \mathbf{x}(t) + \int_0^t \mathbf{k}(t-l)\varepsilon(l)dl \right) + \mathbf{B}u(t), \quad (35)$$

where  $\mathbf{k}$  is a coefficient matrix that varies over time, and has the same shape as  $\overline{\mathbf{B}}$ . Owing to the accumulation of errors in the time domain, we introduce a modifiable factor denoted as  $h([t - \tau, t])$  with backtracking capability to regulate the input. Specifically, the controlled input is defined as  $u_{adj}(t) = h([t - \tau, t])u(t)$ . then we have

$$\dot{\mathbf{x}}(t) = \mathbf{A} \left( \mathbf{x}(t) + \int_0^t \mathbf{k}(t-l)h([l - \tau, l])\varepsilon(l)dl \right) + \mathbf{B}h([t - \tau, t])u(t), \quad (36)$$

then  $h_\tau(t)$  has the ability to adjust the errors with coefficients carrying temporal phases. Taking into account the following observer used for sampling:

$$\dot{\mathbf{z}}(t) = \mathbf{A}\mathbf{z}(t) + \mathbf{B}h([t - \tau, t])(u(t) + \varepsilon(t)), \quad (37)$$

denote  $\mathbf{e}(t) = \mathbf{x}(t) - \mathbf{z}(t)$ , we have

$$\dot{\mathbf{e}}(t) = \mathbf{A}\mathbf{e}(t) + \mathbf{A} \int_0^t \mathbf{k}(t-l)h([l - \tau, l])\varepsilon(l)dl - \mathbf{B}h([t - \tau, t])\varepsilon(t) \quad (38)$$

Consider the Lyapunov function  $\mathcal{L}_e(t) = \mathbf{e}^\top(t)\mathbf{P}\mathbf{e}(t)$ , where  $\mathbf{P}$  is a positive definite symmetric matrix, we can obtain

$$\begin{aligned} \frac{d\mathcal{L}_e(t)}{dt} &= 2\mathbf{e}^\top(t)\mathbf{P}\dot{\mathbf{e}}(t) \\ &= 2\mathbf{e}^\top(t)\mathbf{P} \left( \mathbf{A}\mathbf{e}(t) + \mathbf{A} \int_0^t \mathbf{k}(t-l)h([l - \tau, l])\varepsilon(l)dl - \mathbf{B}h([t - \tau, t])\varepsilon(t) \right) \\ &= \mathbf{e}^\top(t) (\mathbf{P}\mathbf{A} + \mathbf{e}^\top(t)\mathbf{A}^\top\mathbf{P}) \mathbf{e}(t) + \Lambda(t) \\ &= \mathbf{e}^\top(t) (\mathbf{P}\mathbf{A} + \mathbf{A}^\top\mathbf{P}) \mathbf{e}(t) + \Lambda(t), \end{aligned} \quad (39)$$

where

$$\begin{aligned} \Lambda(t) &= \mathbf{e}^\top(t)\mathbf{A} \int_0^t \mathbf{k}(t-l)h([l - \tau, l])\varepsilon(l)dl - \mathbf{e}^\top(t)\mathbf{B}h([t - \tau, t])\varepsilon(t) \\ &= \|\mathbf{e}(t)\| \|\mathbf{A}\| \int_0^t \|\mathbf{k}(t-l)\| |h([l - \tau, l])| |\varepsilon(l)| dl + \|\mathbf{e}(t)\| \|\mathbf{B}\| |h([t - \tau, t])| |\varepsilon(t)| \\ &\leq \|h_\tau\| \|\mathbf{e}(t)\| \left( \int_0^t \|\mathbf{k}(t-l)\| |\varepsilon(l)| dl + \|\mathbf{B}\| |\varepsilon(t)| \right) \end{aligned} \quad (40)$$

Hence, selecting a value of  $|h([t - \tau, t])| < 1$  strengthens the stability of the system, while  $h([t - \tau, t]) \equiv 1$  corresponds to the case without a controller. Additionally, choosing a larger  $\tau$  value can further enhance the control performance.

## A.2 NSS IN 5-LAYERS S4

Due to space constraints, we present the analysis of the deep S4 model here. Specifically, we conducted an experiment on a 5-layer S4 model, extending from the experiment described in Section 2.3. We plotted the results of the hidden states in the first layer and observed the presence of the NSS issue in the 5-layer S4 model, as depicted in Figure 8.2. Notably, the S4 model without Memory Replay exhibited a significant NSS phenomenon. In contrast, the S4+ model with Memory Replay demonstrated highly stable hidden states, as illustrated in Figure 8.4. The sum of absolute values of the states at each time step decreased from  $10^2$  to  $10^1$ , and the output error under perturbation was also reduced (Figure 8.2).

## A.3 EXPERIMENT DETAILS

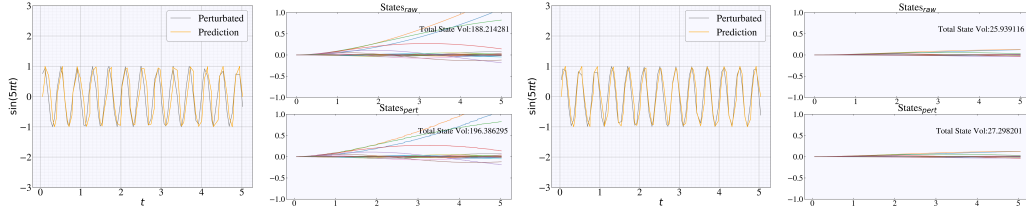

Figure 6: Comparative results for Memory Reply.

Table 5: Detailed training settings used in our experiments.

|                           | Autoregressive language modelling | Bidirectional language modelling |
|---------------------------|-----------------------------------|----------------------------------|
| Data used                 | Wikitext-103                      | Wikitext-103                     |
| Tokenizer method          | BPE                               | BPE                              |
| Vocab size                | 50265                             | 50265                            |
| Sequence length           | 512                               | 512                              |
| Batch size                | 64                                | 64                               |
| Total updates             | 50,000                            | 50,000                           |
| Warmup steps              | 3,000                             | 3,000                            |
| Peak learning rate        | 5e-4                              | 5e-4                             |
| Lr scheduler              | Inverse sqrt                      | Polynomial decay                 |
| Optimizer                 | Adam                              | Adam                             |
| Adam $\epsilon$           | 1e-8                              | 1e-6                             |
| Adam $(\beta_1, \beta_2)$ | (0.9, 0.98)                       | (0.9, 0.98)                      |
| Weight decay              | 0.2 for TNN, 0.1 for others       | 0.2 for TNN, 0.1 for others      |
| Gradient clip norm        | 1.0                               | 1.0                              |
| Dropout                   | 0.1                               | 0.1                              |

Table 6: Detailed training settings used in LRA tasks.

|                     | Retrieval | ListOps | Text | Image | Pathfinder |
|---------------------|-----------|---------|------|-------|------------|
| Num blocks          | 6         | 6       | 4    | 8     | 4          |
| Embedding dimension | 128       | 80      | 128  | 128   | 128        |
| Max length          | 4000      | 2048    | 4096 | 1024  | 1024       |
| Batch size          | 20        | 50      | 16   | 64    | 64         |
| Total epochs        | 20        | 40      | 32   | 200   | 200        |
| Learning rate       | 1e-3      | 1e-4    | 1e-3 | 4e-3  | 2e-4       |
| Weight decay        | 0.1       | 0.0     | 5e-2 | 5e-2  | 0.0        |
| Dropout             | 0.1       | 0.0     | 0.1  | 0.1   | 0.1        |
